# Supplementary material for: Nanocavity-enriched Co3O4@ZnCo2O4@NC porous nanowires derived from 1D metal coordination polymers for fast Li+diffusion kinetics and super Li+storage
Source: Royal Society of Chemistry journal article supplement (doi:10.1039/d1dt00475a), 2021-01-01
Supplement: d1dt00475a1.pdf [file d1dt00475a1.pdf]

Supporting Information

**Nanocavity-enriched  $\text{Co}_3\text{O}_4@\text{ZnCo}_2\text{O}_4@\text{NC}$  porous nanowires  
derived from 1D metal coordination polymers for super  $\text{Li}^+$  storage**

Haibin Wang<sup>a</sup>, Yongjun Zheng<sup>a</sup>, Zilin Peng<sup>b</sup>, Xinlong Liu<sup>b</sup>, Chen Qu<sup>a</sup>, Zhiyin Huang<sup>b</sup>, Zelin Cai<sup>b</sup>, Haosen  
Fan<sup>b\*</sup> and Yufei Zhang<sup>c\*</sup>

<sup>a</sup>*College of Civil Aviation Safety Engineering, Civil Aviation Flight University of China, Guanghan,  
China*

<sup>b</sup>*School of Chemistry and Chemical Engineering, Guangzhou University, Guangzhou 510006, China*

<sup>c</sup>*School of Chemical Engineering and Light Industry, Guangdong University of Technology, Guangzhou  
510006, China*

E-mail: [hsfan@gzhu.edu.cn](mailto:hsfan@gzhu.edu.cn); [yfzhang@gdut.edu.cn](mailto:yfzhang@gdut.edu.cn)

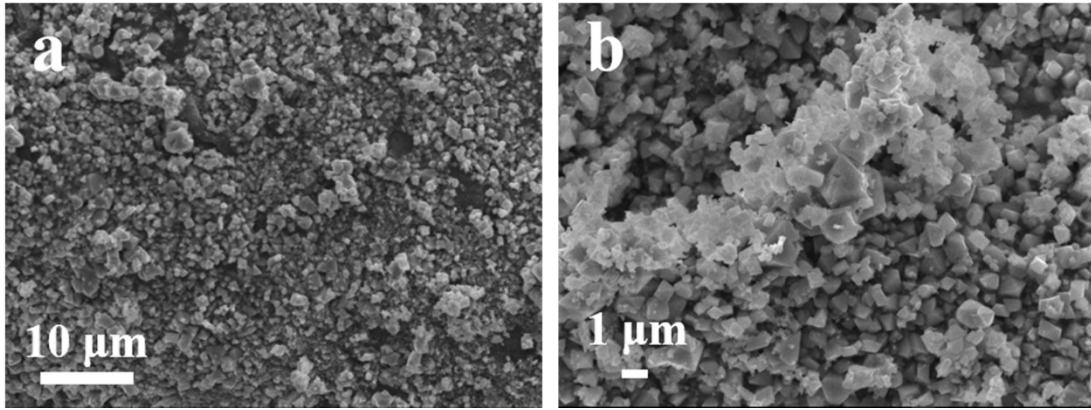

Fig. S1 (a and b) SEM images of ZnCo<sub>2</sub>O<sub>4</sub>.

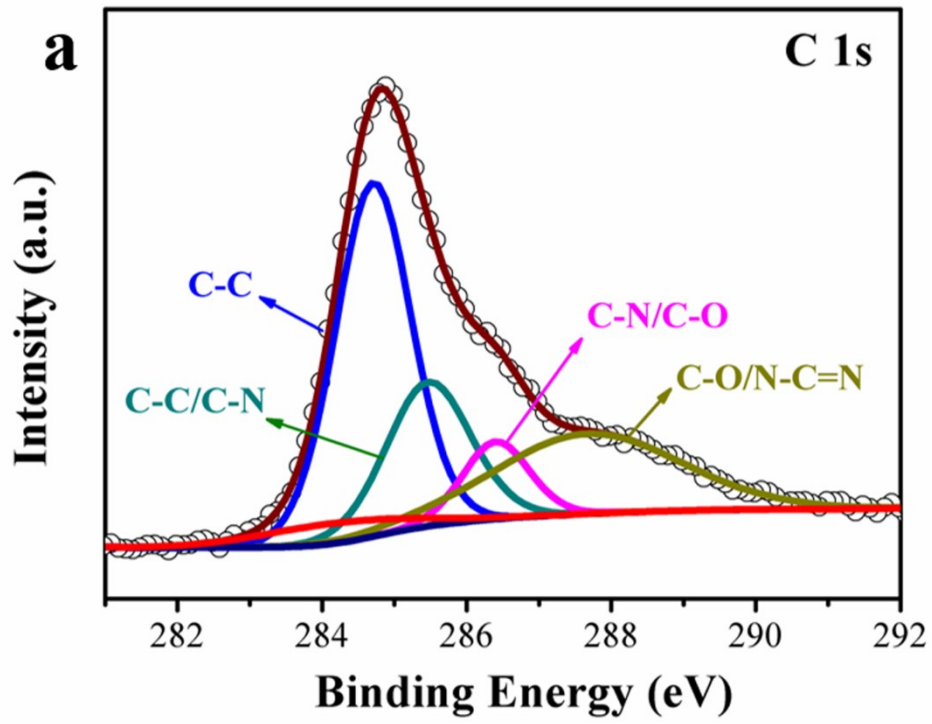

Fig. S2 C 1s the ZnCo<sub>2</sub>O<sub>4</sub>@NC nanowire.

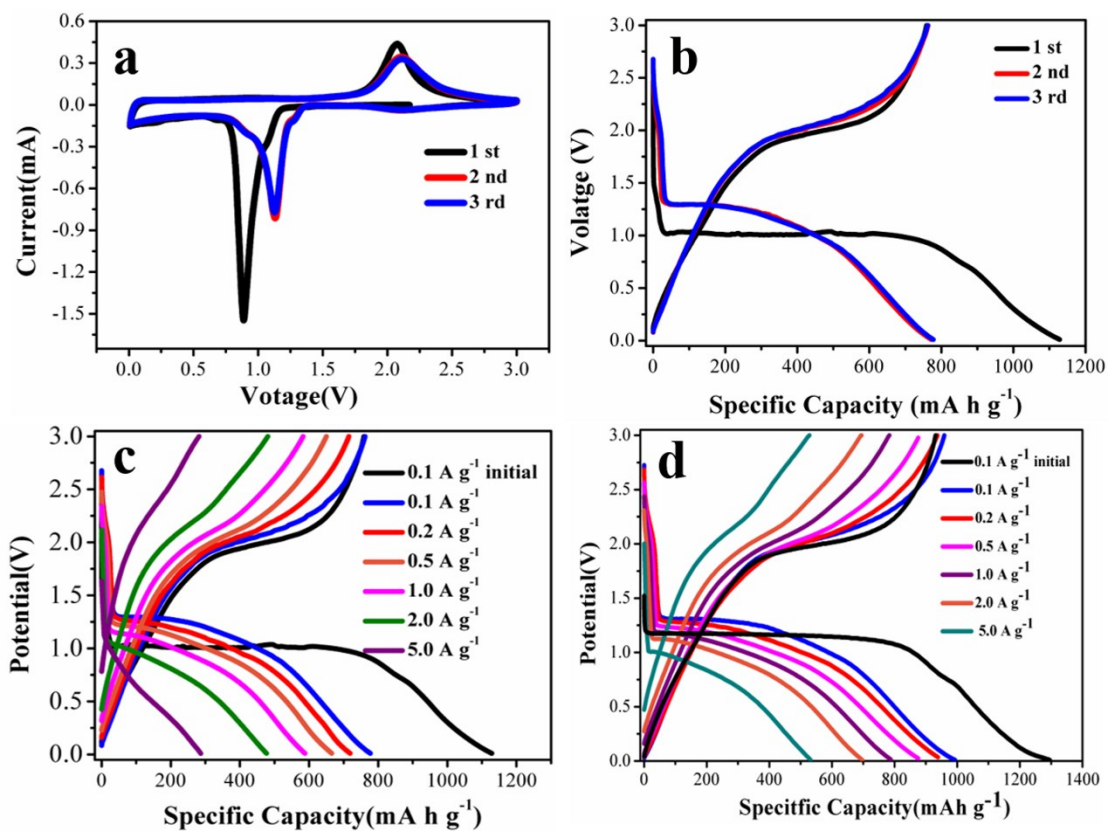

**Fig. S3** (a) CV curves of  $\text{ZnCo}_2\text{O}_4$  nanowires at the scan rate of  $0.1 \text{ mV s}^{-1}$ . (b) Charge/discharge curves of  $\text{ZnCo}_2\text{O}_4$  nanowires at the current density of  $0.1 \text{ A g}^{-1}$ . (c) Charge/Discharge profile of  $\text{ZnCo}_2\text{O}_4$  at various current densities. (d) Charge/Discharge profile of  $\text{ZnCo}_2\text{O}_4/\text{NC}$  at various current densities.

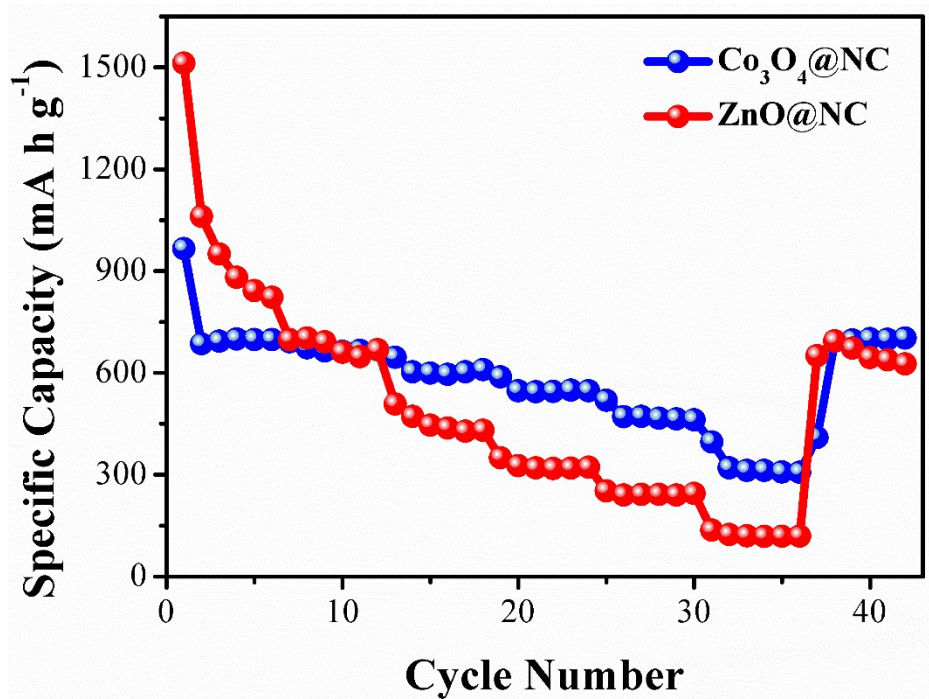

**Figure. S4** the rate performance of  $\text{Co}_3\text{O}_4@\text{NC}$  and  $\text{ZnO}@\text{NC}$  electrode.
